# Supplementary material for: Effects of atomic Ag on AgBr photocatalyst surfaces: a theoretical survey
Source: Royal Society of Chemistry journal article supplement (doi:10.1039/c4ra04228j), 2014-01-01
Supplement: c4ra04228j1.pdf [file c4ra04228j1.pdf]

## Electronic Supplementary Information

### Effects of Atomic Ag on Photocatalyst AgBr surfaces: A Theoretical Survey

Yuhua Chi,<sup>a,b</sup> Lianming Zhao,<sup>a,b</sup> Xiaoqing Lu,<sup>a,b</sup> Wenyue Guo,<sup>\*a,b</sup> Yunqi Liu,<sup>\*\*c</sup> and Chi-Man Lawrence Wu<sup>d</sup>

<sup>a</sup>College of Science, China University of Petroleum, Qingdao, Shandong 266580, P. R. China

<sup>b</sup>Key Laboratory of New Energy Physics & Materials Science in Universities of Shandong Province, China University of Petroleum, Qingdao, Shandong 266580, P. R. China

<sup>c</sup>State Key Laboratory of Heavy Oil Processing, Key Laboratory of Catalysis, CNPC, China University of Petroleum, Qingdao 266580, P. R. China

<sup>d</sup>Department of Physics and Materials Science, City University of Hong Kong, Hong Kong SAR, P. R. China

**(Correspondence should be addressed to [wgyuo@upc.edu.cn](mailto:wgyuo@upc.edu.cn), [liuyq@upc.edu.cn](mailto:liuyq@upc.edu.cn).)**

**Table S1.** The Hubbard  $U$  parameters (eV) for Ag(d) and Br(p) and the resulting band gap (eV) for bulk AgBr.

| $U_{\text{Ag,d}}$ | $U_{\text{Br,p}}$ | Band gap |
|-------------------|-------------------|----------|
| 2.0               | 1.8               | 2.798    |
| 1.8               | 1.5               | 2.703    |
| 1.6               | 1.3               | 2.633    |
| 1.4               | 1.1               | 2.563    |

**Table S2.** The calculated Mulliken atomic populations for the bulk, clean and atomic Ag adsorbed (100) and (110) facets of AgBr.

| Orbitals          | Bulk | Clean (100) | Adsorbed (100) | Clean (110) | Adsorbed (110) |
|-------------------|------|-------------|----------------|-------------|----------------|
| <sup>a</sup> Br s | 1.68 | 1.91        | 1.73           | 1.96        | 1.92           |
| <sup>a</sup> Br p | 5.37 | 5.4         | 5.35           | 5.4         | 5.38           |
| <sup>a</sup> Ag s | 0.43 | 0.38        | 0.48           | 0.37        | 0.52           |
| <sup>a</sup> Ag p | 0.54 | 0.45        | 0.54           | 0.41        | 0.47           |
| <sup>a</sup> Ag d | 9.99 | 9.98        | 9.97           | 9.98        | 9.96           |
| <sup>b</sup> Ag s |      |             | 0.84           |             | 0.63           |
| <sup>b</sup> Ag p |      |             | 0.23           |             | 0.53           |
| <sup>b</sup> Ag d |      |             | 9.96           |             | 9.93           |

<sup>a</sup>Br/Ag represents Br/Ag<sub>sur</sub> for the clean (100), Br/Ag<sub>1sur</sub> for the adsorbed (100), Br/Ag<sub>ed</sub> for the clean (110), and Br/Ag<sub>1ed</sub> for the adsorbed (110) facet. <sup>b</sup>Ag represents the adsorbed Ag (Ag<sub>ad</sub>)

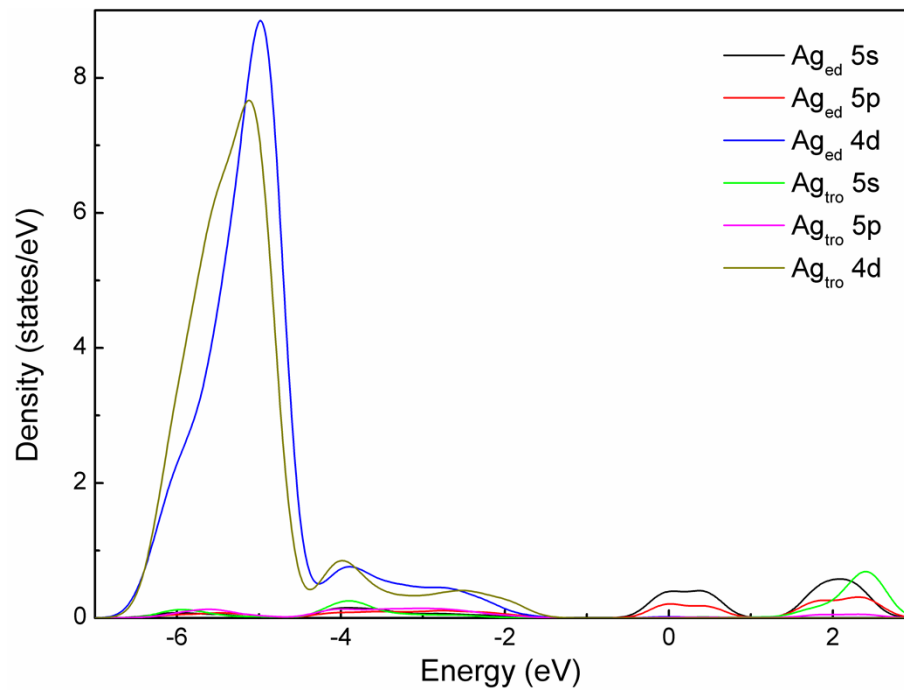

**Fig. S1.** The PDOS of  $\text{Ag}_{\text{ed}}$  and  $\text{Ag}_{\text{tro}}$  on the atomic Ag adsorbed AgBr(110) facet.

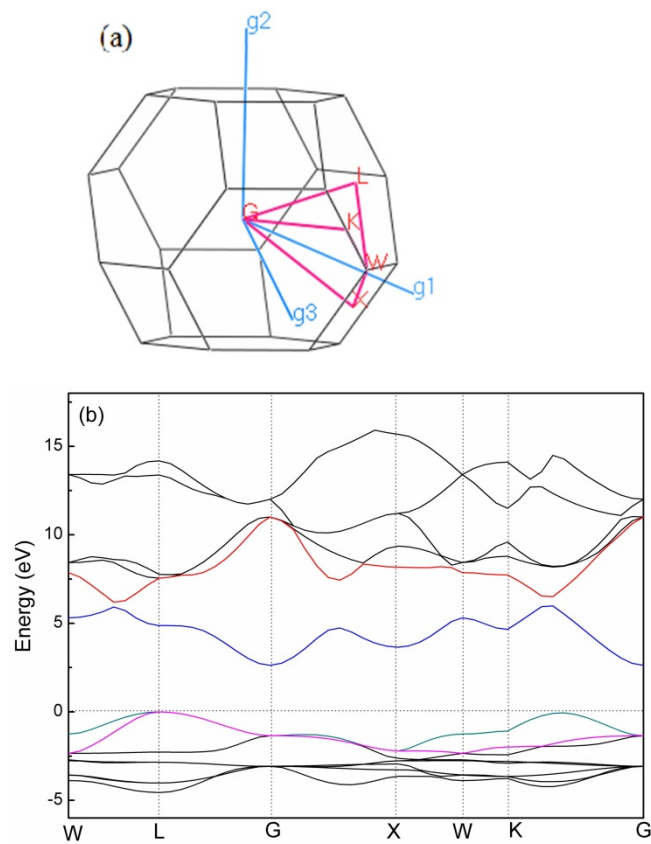

**Fig. S2.** Brillouin zone of bulk AgBr in reciprocal lattice (a). Band structure of bulk AgBr (b).

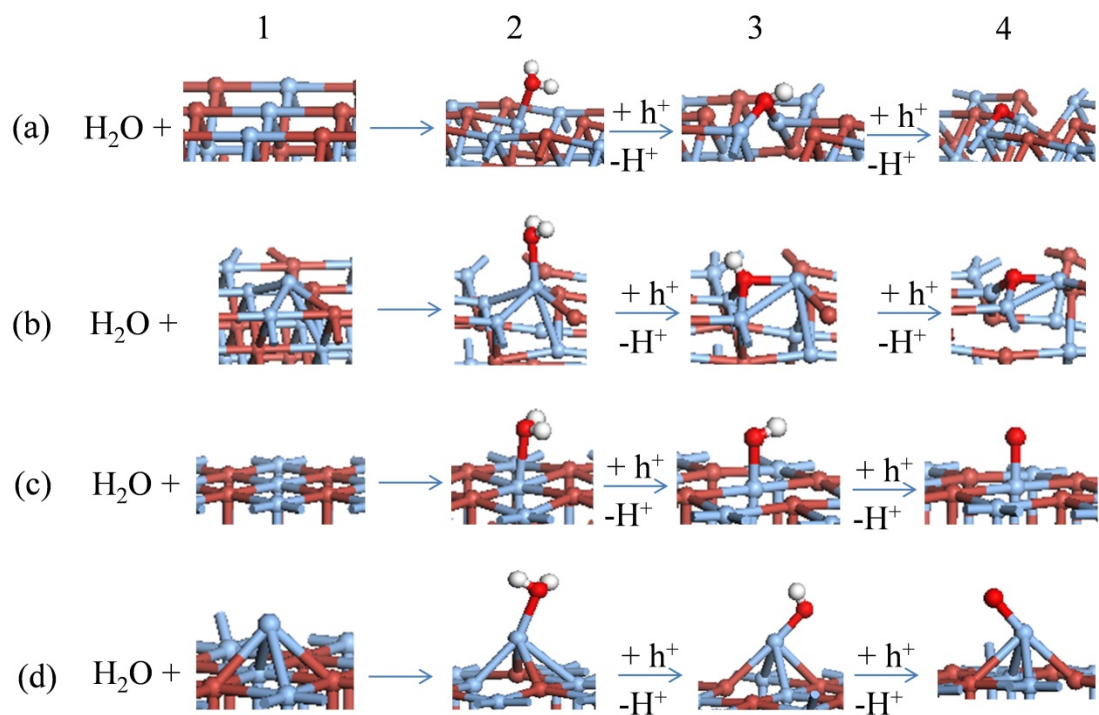

**Fig. S3.** Intermediate structures for water dissociation on the clean AgBr(110) (a), atomic Ag adsorbed AgBr(110) (b), clean AgBr(100) (c), and atomic Ag adsorbed Br(100) (d) facets.

## Section S1. Estimation of the positions of the conduction band and the valence band

The position of the conduction band can be estimated using the equation<sup>1</sup>:

$$E_{CB} = X - E_C - 0.5E_g,$$

$$E_{VB} = E_g + E_{CB},$$

where  $E_C$  represents the energy of free electrons on the hydrogen scale (4.5 eV),  $X$  is the electronegativity of the semiconductor, and  $E_g$  represents the bandgap of the system.

The CBM of the bulk AgBr is calculated to be -3.42 eV (vs NHE), and the VBM to be -0.79eV (vs NHE). This VBM potential does not meet the hydrolysis to produce  $H_2$ ,  $\psi^0(H_2/H_2O) = 0 \text{ eV}$  (vs NHE). But the VBM is more positive than  $\psi^0(O_2/H_2O) = -1.23 \text{ eV}$  (vs NHE), rendering water oxidization occur to generate  $O_2$  with the help of the photogenerated holes over the AgBr.

### References

[1] C. An, J. Wang, W. Jiang, M. Zhang, X. Ming, S. Wang and Q. Zhang, *Nanoscale* 2012, 4, 5646.
